# Supplementary material for: SAINT: A Phase I/Expanded Phase II Study Using Safe Amounts of Ipilimumab, Nivolumab and Trabectedin as First-Line Treatment of Advanced Soft Tissue Sarcoma
Source: MDPI journal article supplement (doi:10.3390/cancers15030906), 2023-01-31
Supplement: s1 [file s1]

## Supplementary Materials

**Table S1. Grade 3 or Greater Adverse Events Unrelated to Study Therapy.**

| PHASE 1 – DOSE LEVEL 1 (n=3)                           |           |   |
|--------------------------------------------------------|-----------|---|
| Adverse Event                                          | Grade     |   |
|                                                        | 3         | 4 |
| <b>Gastrointestinal disorders</b>                      |           |   |
| Abdominal pain                                         | 1 (33.3%) |   |
| PHASE 1 – DOSE LEVEL 2 (n=6)                           |           |   |
| Adverse Event                                          | Grade     |   |
|                                                        | 3         | 4 |
| <b>Cardiac Disorders</b>                               |           |   |
| Pericardial effusion                                   | 1 (16.7%) |   |
| <b>Investigations</b>                                  |           |   |
| Alanine aminotransferase increased                     | 1 (16.7%) |   |
| <b>Metabolism and nutrition disorders</b>              |           |   |
| Hyponatremia                                           | 1 (16.7%) |   |
| Hypoalbuminemia                                        | 1 (16.7%) |   |
| <b>Respiratory, thoracic and mediastinal disorders</b> |           |   |
| Pleural effusion                                       | 1 (16.7%) |   |
| Dyspnea                                                | 1 (16.7%) |   |
| Acute respiratory failure                              | 1 (16.7%) |   |
| EXPANDED PHASE 2 (n=92)                                |           |   |
| Adverse Event                                          | Grade     |   |
|                                                        | 3         | 4 |
| <b>Blood and lymphatic disorders</b>                   |           |   |
| Anemia                                                 | 1 (1.1%)  |   |
| <b>Cardiac Disorders</b>                               |           |   |
| Aortic stenosis                                        | 1 (1.1%)  |   |
| Chest pain – cardiac                                   | 1 (1.1%)  |   |
| Acute coronary syndrome                                | 1 (1.1%)  |   |
| Atrial fibrillation with RVR                           | 2 (2.2%)  |   |

|                                                             |          |          |
|-------------------------------------------------------------|----------|----------|
| <b>Endocrine disorders</b>                                  |          |          |
| Adrenal insufficiency                                       | 1 (1.1%) |          |
| <b>Gastrointestinal disorders</b>                           |          |          |
| Diarrhea                                                    | 1 (1.1%) |          |
| Anorexia                                                    | 1 (1.1%) |          |
| Nausea                                                      | 1 (1.1%) |          |
| Abdominal pain                                              | 3 (3.3%) |          |
| Vomiting                                                    | 1 (1.1%) |          |
| RUQ pain                                                    | 2 (2.2%) |          |
| Colitis                                                     | 1 (1.1%) |          |
| <b>General disorders and administration site conditions</b> |          |          |
| Fatigue                                                     | 2 (2.2%) |          |
| Edema                                                       | 2 (2.2%) |          |
| Multiorgan failure                                          | 1 (1.1%) |          |
| Non-cardiac chest pain                                      | 1 (1.1%) |          |
| Fluid overload                                              | 1 (1.1%) |          |
| <b>Hepatobiliary disorders</b>                              |          |          |
| Hepatitis, acute                                            | 1 (1.1%) |          |
| <b>Infections and infestations</b>                          |          |          |
| Sepsis                                                      | 5 (5.4%) |          |
| Bacteremia                                                  | 1 (1.1%) |          |
| Cellulitis                                                  | 1 (1.1%) |          |
| Urinary tract infection                                     | 2 (2.2%) |          |
| Urosepsis                                                   | 1 (1.1%) |          |
| <b>Investigations</b>                                       |          |          |
| CPK increased                                               | 2 (2.2%) |          |
| Prolonged QTc                                               | 1 (1.1%) |          |
| White blood cell decreased                                  |          | 1 (1.1%) |
| CHF (dec EF 15%)                                            |          | 1 (1.1%) |
| Creatinine increased                                        | 1 (1.1%) |          |
| Aspartate aminotransferase increased                        | 2        | 1 (1.1%) |
| Alanine aminotransferase increased                          | 1 (1.1%) |          |

|                                                        |          |          |
|--------------------------------------------------------|----------|----------|
| Lymphocyte count decreased                             | 1 (1.1%) |          |
| <b>Metabolism and nutrition disorders</b>              |          |          |
| Hypokalemia                                            | 1 (1.1%) |          |
| Hyperglycemia                                          | 3 (3.3%) |          |
| Hypoalbuminemia                                        | 3 (3.3%) |          |
| Hyponatremia                                           | 6 (6.5%) | 1 (1.1%) |
| Hypocalcemia                                           | 4 (4.3%) | 2 (2.2%) |
| Dehydration                                            | 3 (3.3%) |          |
| Hypophosphatemia                                       | 2 (2.2%) |          |
| Hyperbilirubinemia                                     | 1 (1.1%) |          |
| Hyperkalemia                                           |          | 1 (1.1%) |
| <b>Musculoskeletal and connective tissue disorders</b> |          |          |
| Back pain                                              | 4 (4.3%) |          |
| Thigh pain                                             | 1 (1.1%) |          |
| Hip pain                                               | 1 (1.1%) |          |
| Chest wall pain                                        | 2 (2.2%) |          |
| Neck pain                                              | 1 (1.1%) |          |
| Arm pain                                               | 1 (1.1%) |          |
| Hand pain                                              | 1 (1.1%) |          |
| Flank pain                                             | 1 (1.1%) |          |
| Shoulder pain                                          | 1 (1.1%) |          |
| Ankle pain                                             | 4 (4.3%) |          |
| Body pain                                              | 2 (2.2%) |          |
| Asthenia                                               | 1 (1.1%) |          |
| Generalized weakness                                   | 2 (2.2%) |          |
| Pelvic pain                                            | 1 (1.1%) |          |
| <b>Nervous system disorders</b>                        |          |          |
| Leptomeningeal carcinomatosis                          | 1 (1.1%) |          |
| Altered mental status                                  | 1 (1.1%) |          |
| Left sided sciatica                                    | 1 (1.1%) |          |
| Nerve pain                                             | 1 (1.1%) |          |
| <b>Renal and urinary disorders</b>                     |          |          |

|                                                        |          |  |
|--------------------------------------------------------|----------|--|
| Acute renal failure                                    | 1 (1.1%) |  |
| <b>Respiratory, thoracic and mediastinal disorders</b> |          |  |
| Dyspnea                                                | 7 (7.6%) |  |
| Pleuritic chest pain                                   | 1 (1.1%) |  |
| Hypoxic ARDS                                           | 1 (1.1%) |  |
| Epistaxis                                              | 1 (1.1%) |  |
| Respiratory depression                                 | 1 (1.1%) |  |
| Cheyne stoke breathing                                 | 1 (1.1%) |  |
| Pleural effusion                                       | 1 (1.1%) |  |
| Acute hypoxic respiratory failure                      | 1 (1.1%) |  |
| PNA, community acquired                                | 1 (1.1%) |  |
| Pneumothorax                                           | 1 (1.1%) |  |
| Hypoxia                                                | 2 (2.2%) |  |
| Pneumonia                                              | 1 (1.1%) |  |
| Pulmonary embolism                                     | 1 (1.1%) |  |
| <b>Vascular disorders</b>                              |          |  |
| Hypertension                                           | 1 (1.1%) |  |
| Acute thrombus right subclavian                        | 1 (1.1%) |  |

**Table S2. Listing of subtypes, mutation, no. of cycles, BORR, PFS and OS.**

| <b>Patient</b>               | <b>Sarcoma Histology</b>                                                     | <b>Mutation(s), if known</b> | <b>Number of Cycles Treated</b> | <b>Best Response RECIST v1.1</b> | <b>Best Response iRecist</b> | <b>PFS, weeks</b> | <b>OS, weeks</b> |
|------------------------------|------------------------------------------------------------------------------|------------------------------|---------------------------------|----------------------------------|------------------------------|-------------------|------------------|
| <b>PHASE I-DOSE LEVEL I</b>  |                                                                              |                              |                                 |                                  |                              |                   |                  |
| 1                            | Leiomyosarcoma                                                               | none                         | 4                               | SD                               | SD                           | 35                | 203              |
| 2                            | Liposarcoma, dedifferentiated                                                | pan-TRK expression           | <1                              | SD                               | SD                           | 6                 | 13               |
| 3                            | Leiomyosarcoma                                                               | none                         | 2                               | SD                               | SD                           | 25                | 85               |
| <b>PHASE I-DOSE LEVEL II</b> |                                                                              |                              |                                 |                                  |                              |                   |                  |
| 4                            | Desmoplastic small cell tumor with myogenic/rhabdomyoblastic differentiation | EWSR1-WT1 fusion, TMB-Low    | 20                              | SD                               | SD                           | 67                | 126              |
| 5                            | Rhabdomyosarcoma                                                             |                              | <1                              | NE                               | NE                           | NE                | 15               |
| 6                            | Osteosarcoma                                                                 | none                         | 15                              | PD                               | PD                           | 14                | 24               |

|                          |                                |                                                             |    |    |    |    |     |
|--------------------------|--------------------------------|-------------------------------------------------------------|----|----|----|----|-----|
| 7                        | Leiomyosarcoma                 | none                                                        | 3  | SD | SD | 19 | 184 |
| 8                        | Liposarcoma, de-differentiated | p53<br>WILDTYPE<br>MDM2<br>amplification                    | 14 | SD | SD | 49 | 95  |
| 9                        | Rhabdomyosarcoma               | none                                                        | 5  | SD | SD | 28 | 36  |
| <b>EXPANDED PHASE II</b> |                                |                                                             |    |    |    |    |     |
| 1                        | Leiomyosarcoma                 | none                                                        | 6  | SD | SD | 21 | 74  |
| 2                        | Liposarcoma, de-differentiated | CDK4, MDM2,<br>ESR1<br>amplification,<br>MLL2<br>alteration | 13 | SD | SD | 78 | 202 |
| 3                        | Round cell sarcoma             | CIC-DUX4<br>fusion                                          | <1 | NE | NE | NE | 13  |
| 4                        | Myxoid chondrosarcoma          | GNAS R201C;<br>MLH1:<br>Positive 2+,                        | 13 | SD | SD | 72 | 200 |

|   |                            |                                                                                                                       |    |    |    |    |     |
|---|----------------------------|-----------------------------------------------------------------------------------------------------------------------|----|----|----|----|-----|
|   |                            | 90%; MSH2:<br><br>Positive 2+,<br><br>90%; MSH6:<br><br>Positive 1+,<br><br>90%; PMS2:<br><br>Positive 1+,<br><br>90% |    |    |    |    |     |
| 5 | Pleomorphic<br><br>sarcoma | none                                                                                                                  | 2  | SD | SD | 19 | 19  |
| 6 | Synovial sarcoma           | none                                                                                                                  | 7  | SD | SD | 44 | 97  |
| 7 | Leiomyosarcoma             | TMB - 2<br><br>Muts/Mb,<br><br>MAP3K6 -<br><br>Splice site<br><br>1256-2A>G,<br><br>RB1 - Loss,<br><br>TP53 - Loss    | 11 | PR | PR | 86 | 199 |
| 8 | Undifferentiated           | none                                                                                                                  | 4  | SD | SD | 27 | 32  |
|   | pleomorphic<br><br>sarcoma |                                                                                                                       |    |    |    |    |     |

|    |                                               |                                                                                                                                                                                                |    |                      |                      |    |     |
|----|-----------------------------------------------|------------------------------------------------------------------------------------------------------------------------------------------------------------------------------------------------|----|----------------------|----------------------|----|-----|
| 9  | Myxoid round<br><br>cell liposar-<br><br>coma | NYESO<br><br>positive tumor;<br><br>MLH1 -<br><br>Positive 2+,<br><br>90%; MSH2 -<br><br>Positive 3+,<br><br>90%; MSH6 -<br><br>Positive 2+,<br><br>80%; PMS2 -<br><br>Positive 2+,<br><br>80% | 12 | PR                   | PR                   | 92 | 137 |
| 10 | Leiomyosarcoma                                | EGFR, MET(+)                                                                                                                                                                                   | 12 | SD                   | SD                   | 53 | 197 |
| 11 | Pleomorphic<br><br>liposarcoma                | c-KIT Exon 11<br><br>mutation (p.<br><br>V560del)                                                                                                                                              | <1 | SD                   | SD                   | 63 | 79  |
| 12 | Pleomorphic<br><br>sarcoma                    | EGFR<br><br>(amplification),<br><br>RICTOR<br><br>(amplification),<br><br>CRKL                                                                                                                 | 10 | CR<br><br>(surgical) | CR<br><br>(surgical) | 59 | 196 |



|    |                                   |                                                                                                                                                                                                                                                                                                   |    |    |    |    |    |
|----|-----------------------------------|---------------------------------------------------------------------------------------------------------------------------------------------------------------------------------------------------------------------------------------------------------------------------------------------------|----|----|----|----|----|
|    |                                   | (amplification),<br>EPHA3<br>(amplification),<br>FGF10<br>(amplification),<br>MALT1<br>(amplification),<br>MAPK1<br>(amplification),<br>RB1 (loss),<br>TP53 (loss);<br>MLH1 -<br>Positive 1+,<br>80%; MSH2 -<br>Positive 2+,<br>95%; MSH6 -<br>Positive 2+,<br>95%; PMS2 -<br>Positive 1+,<br>90% |    |    |    |    |    |
| 13 | Alveolar soft part<br><br>sarcoma | none                                                                                                                                                                                                                                                                                              | 12 | SD | SD | 43 | 92 |

|    |                                                    |                                                                                                                                                                                                                                                                                                                                   |         |    |    |     |     |
|----|----------------------------------------------------|-----------------------------------------------------------------------------------------------------------------------------------------------------------------------------------------------------------------------------------------------------------------------------------------------------------------------------------|---------|----|----|-----|-----|
| 14 | Undifferentiated<br><br>pleomorphic<br><br>sarcoma | none                                                                                                                                                                                                                                                                                                                              | 15      | CR | CR | 105 | 191 |
| 15 | Osteosarcoma                                       | none                                                                                                                                                                                                                                                                                                                              | 2       | SD | SD | 4   | 49  |
| 16 | Leiomyosarcoma                                     | Pathogenic<br><br>Variant:<br><br>ATRX,<br><br>TP53;<br><br>ER: Positive<br><br>1+, 90%;<br><br>MLH1:<br><br>Positive 1+,<br><br>100%; MSH2:<br><br>Positive 2+,<br><br>95%; MSH6:<br><br>Positive 1+,<br><br>10%; PMS2:<br><br>Positive 1+,<br><br>40%; PR:<br><br>Positive 1+,<br><br>90%; PTEN:<br><br>Positive 2+,<br><br>85% | 11      | SD | SD | 42  | 157 |
| 17 | Leiomyosarcoma                                     | none                                                                                                                                                                                                                                                                                                                              | 1<br>10 | NE | NE | NE  | 11  |

|    |                                  |                                                                                 |    |    |    |    |    |
|----|----------------------------------|---------------------------------------------------------------------------------|----|----|----|----|----|
| 18 | Leiomyosarcoma                   | none                                                                            | 2  | SD | SD | 6  | 7  |
| 19 | Peripheral nerve<br>sheath tumor | BRAF, PTEN,<br>MYC, ARID2,<br>CDKN2A,<br>CHEK2,<br>EPHA7,<br>LRP1B, ROS1<br>(+) | <1 | NE | NE | NE | 31 |
| 20 | Pleomorphic<br>rhabdomyosarcoma  | none                                                                            | 1  | PD | PD | 15 | 22 |
| 21 | Pleomorphic<br>rhabdomyosarcoma  | none                                                                            | <1 | NE | NE | NE | 4  |
| 22 | Clear cell sarcoma               | EWSR1-ATF1<br>Fusion                                                            | 4  | PR | PR | 30 | 52 |
| 23 | Epithelioid<br>sarcoma           | NYESO<br>Positive 2%                                                            | 2  | SD | SD | 14 | 88 |

|    |                                |                                                                                                                                                                                                |   |    |    |    |     |
|----|--------------------------------|------------------------------------------------------------------------------------------------------------------------------------------------------------------------------------------------|---|----|----|----|-----|
| 24 | Angiosarcoma                   | Pathogenic<br><br>Variant: POT1;<br><br>MLH1:<br><br>Positive 3+,<br><br>95%; MSH2:<br><br>Positive 3+,<br><br>95%; MSH6:<br><br>Positive 2+,<br><br>95%; PMS2:<br><br>Positive 2+,<br><br>95% | 2 | PD | PD | 6  | 169 |
| 25 | Liposarcoma, de-differentiated | CDK4 -<br><br>Amplified;<br><br>MSI-<br><br>Intermediate;<br><br>AKT2 -<br><br>Amplified;<br><br>CD274 (PD-L1) -<br><br>Amplified;<br><br>MDM2 -<br><br>Amplified ;<br><br>MLH1 -              | 8 | SD | SD | 32 | 167 |

|    |                                                    |                                                                                                                               |             |                      |                      |    |     |
|----|----------------------------------------------------|-------------------------------------------------------------------------------------------------------------------------------|-------------|----------------------|----------------------|----|-----|
|    |                                                    | Positive 1+,<br>25%; MSH2 -<br><br>Positive 1+,<br>100%; MSH6 -<br><br>Positive 1+,<br>75%; PMS2 -<br><br>Positive 1+,<br>75% |             |                      |                      |    |     |
| 26 | NOS Sarcoma                                        | ER/PR (+),<br><br>HER2 (--)                                                                                                   | 4           | SD                   | SD                   | 13 | 55  |
| 27 | Clear cell sarcoma                                 | Foundation<br><br>One: EWSR1-<br>ATF1 fusion,<br><br>Tumor Muta-<br>tion Burden<br><br>Low                                    | 1           | NE                   | NE                   | NE | 5   |
| 28 | Clear cell sarcoma                                 | Paradigm:<br><br>SETD2 (+);<br><br>MLH1, MSH2,<br><br>MSH6, PMS2,<br><br>hENT1 (+)                                            | 9           | SD                   | SD                   | 28 | 37  |
| 29 | Undifferentiated<br><br>pleomorphic<br><br>sarcoma | none                                                                                                                          | 8<br><br>13 | CR<br><br>(surgical) | CR<br><br>(surgical) | 50 | 163 |

|    |                                 |                                                                              |    |    |    |    |     |
|----|---------------------------------|------------------------------------------------------------------------------|----|----|----|----|-----|
| 30 | Solitary fibrous tumor          | none                                                                         | 6  | SD | SD | 20 | 162 |
| 31 | Synovial sarcoma                | none                                                                         | 7  | CR | CR | 56 | 140 |
| 32 | Myxoid liposarcoma              | FGFR2(+);<br>CDK4 (+);<br>FLT4 (+);<br>MDM2 (+);<br>RICTOR (+);<br>RNF43 (+) | 9  | SD | SD | 27 | 107 |
| 33 | Myxoid liposarcoma              | MLH1, MSH2,<br>MSH6, PMS2<br>(+)                                             | 10 | SD | SD | 30 | 158 |
| 34 | Synovial sarcoma                | CTNNB1 (+),<br>MSH2 (+)                                                      | 7  | PR | PR | 22 | 48  |
| 35 | Myxofibrosarcoma                | none                                                                         | 6  | SD | SD | 19 | 37  |
|    | and giant cell tumor components |                                                                              |    |    |    |    |     |
| 36 | Rhabdomyosarcoma                | none                                                                         | 10 | SD | SD | 34 | 156 |
| 37 | Carcinosarcoma                  | none                                                                         | 12 | PD | PD | 6  | 18  |

|    |                |                                                                              |                                  |    |    |    |     |
|----|----------------|------------------------------------------------------------------------------|----------------------------------|----|----|----|-----|
| 38 | Leiomyosarcoma | PTEN,<br><br>Microsatellite-<br>stable, PC,<br><br>TP53, TMB-<br><br>low     | 8                                | SD | SD | 53 | 134 |
| 39 | Liposarcoma    | CDK4<br><br>amplification,<br><br>MDM2<br><br>amplification                  | 6                                | SD | SD | 18 | 99  |
| 40 | Leiomyosarcoma | none                                                                         | 6                                | CR | CR | 23 | 146 |
| 41 | Leiomyosarcoma | ALK TNS1-<br><br>ALK fusion<br><br>and SMAR-<br><br>CAL1-<br><br>ALK fusion; | 2                                | PD | PD | 4  | 146 |
|    |                | CDKN2A/B<br><br>loss; MED12<br><br>G44A; RUNX1<br><br>V130fs*8               |                                  |    |    |    |     |
| 42 | Leiomyosarcoma | ATRX (+);<br><br>TP53(+); CAIX<br><br>(+); TOPO1(+);<br><br>MGMT(+)          | <1<br><br><br><br><br><br><br>15 | NE | NE | NE | 9   |

|    |                                      |                                    |    |    |    |    |     |
|----|--------------------------------------|------------------------------------|----|----|----|----|-----|
| 43 | Myxofibrosarcoma                     | none                               | 1  | NE | NE | NE | 4   |
| 44 | Myxofibrosarcoma                     | PDL1 (+), APC (+), TP53 (+)        | 10 | CR | CR | 32 | 143 |
| 45 | Peripheral nerve sheath tumor        | none                               | <1 | NE | NE | NE | 8   |
| 46 | Liposarcoma                          | TMB Intermediate (12 mutations/Mb) | 7  | PR | PR | 26 | 84  |
| 47 | Solitary fibrous tumor               | CREBBP (+)                         | 8  | SD | SD | 40 | 81  |
| 48 | Undifferentiated pleomorphic sarcoma | PTEN (+); NTRK2 (+)                | 1  | SD | SD | 15 | 54  |
| 49 | Peripheral nerve sheath tumor        | NF1 (+)                            | 16 | SD | SD | 79 | 125 |



|    |                 |                                                                                                                                                                                                                                                                       |   |    |    |    |    |
|----|-----------------|-----------------------------------------------------------------------------------------------------------------------------------------------------------------------------------------------------------------------------------------------------------------------|---|----|----|----|----|
| 50 | Stromal sarcoma | <p>CREBBP:<br/>Mutated,<br/>Pathogenic;</p> <p>IDH2:<br/>Mutated,<br/>Pathogenic;</p> <p>MED12:<br/>Mutated,<br/>Pathogenic;</p> <p>PRDM1:<br/>Mutated, Path-<br/>ogenic; MLH1<br/>Positive 1+,<br/>100%;</p> <p>MSH2 Positive<br/>3+, 100%;</p> <p>MSH6 Positive</p> | 6 | PR | PR | 20 | 61 |
|    |                 | <p>1+, 100%;</p> <p>PMS2 Positive<br/>1+, 100%;</p> <p>PTEN Positive<br/>2+, 100%</p>                                                                                                                                                                                 |   |    |    |    |    |

|    |                                          |                                                                         |    |    |    |    |     |
|----|------------------------------------------|-------------------------------------------------------------------------|----|----|----|----|-----|
| 51 | Sarcoma with<br>myoid<br>differentiation | none                                                                    | 3  | SD | SD | 15 | 17  |
| 52 | Liposarcoma                              | CDK4 (+);<br>RB1(+);<br>CD274 (PD-<br>L1), MDM2,<br>TOP1 -<br>Amplified | 3  | SD | SD | 14 | 70  |
| 53 | Desmoplastic<br>small<br>round cell      | EWSR1-WT1<br>fusion                                                     | 9  | PR | PR | 39 | 122 |
| 54 | Liposarcoma                              | CDK4 (+),<br>MDM2 (+),<br>PD-L1 (+) - 5%                                | 10 | CR | CR | 31 | 118 |

|    |                  |                                                                                                                                                                                                                                                                             |    |    |    |    |     |
|----|------------------|-----------------------------------------------------------------------------------------------------------------------------------------------------------------------------------------------------------------------------------------------------------------------------|----|----|----|----|-----|
| 55 | Leiomyosarcoma   | MLH1 Positive<br>1+, 75%;<br>MSH2 Positive<br>2+, 100%;<br>MSH6 Positive<br>2+, 65%;<br>PMS2 Positive<br>1+, 10%, PTEN<br>Pathogenic<br>Variant Exon 5<br>p.D92E; RB1<br>Pathogenic<br>Variant Exon<br>17<br>c.1695+1G>T;<br>TP53<br>Pathogenic<br>Variant Exon 6<br>p.E224 | 8  | PR | PR | 30 | 117 |
| 56 | Synovial sarcoma | none                                                                                                                                                                                                                                                                        | 9  | PR | PR | 33 | 34  |
| 57 | Stromal sarcoma  | ER (+), PR (+),<br>TMB -                                                                                                                                                                                                                                                    | 2  | PD | PD | 9  | 54  |
|    |                  | intermediate,<br>PTEN positive                                                                                                                                                                                                                                              | 19 |    |    |    |     |

|    |                                                    |                                                                                                                               |    |    |    |    |     |
|----|----------------------------------------------------|-------------------------------------------------------------------------------------------------------------------------------|----|----|----|----|-----|
| 58 | Undifferentiated<br><br>pleomorphic<br><br>sarcoma | PD-L1 - 5%                                                                                                                    | 2  | SD | SD | 15 | 64  |
| 59 | NOS sarcoma                                        | EWSR1-<br><br>CREB3L2<br><br>fusion                                                                                           | 8  | SD | SD | 25 | 109 |
| 60 | Myxofibrosarcoma                                   | none                                                                                                                          | 9  | PR | PR | 49 | 52  |
| 61 | Leiomyosarcoma                                     | TMB -<br><br>Intermediate,<br><br>ATRX:<br><br>Pathogenic<br><br>Variant Exon 9<br><br>p.R781;<br><br>AURKB:<br><br>Amplified | 16 | SD | SD | 65 | 108 |
| 62 | Undifferentiated                                   | PD-L1 TPS<br><br>5%, PTEN loss,<br><br>CKS1B                                                                                  | 2  | PD | PD | 7  | 107 |

|    |                        |                                                                                                                                           |    |    |    |    |    |
|----|------------------------|-------------------------------------------------------------------------------------------------------------------------------------------|----|----|----|----|----|
|    | pleomorphic<br>sarcoma | amplification,<br>MCL1<br><br>amplification,<br>RB1 loss,<br><br>TOP1<br><br>amplification,<br>TP53 mutation,<br>TSC 2+ marker<br>present |    |    |    |    |    |
| 63 | Carcinosarcoma         | TMB -<br><br>intermediate;<br><br>PTEN:<br><br>positive, 90%;<br><br>KRAS - G12D;<br><br>MUTYH:<br><br>pathogenic var-<br>iant; TP53 (+)  | 6  | SD | SD | 19 | 51 |
| 64 | Pleomorphic<br>sarcoma | ATRX -<br><br>Pathogenic<br><br>Variant Exon 9<br><br>p.T363fs; TP53                                                                      | 11 | SD | SD | 32 | 73 |

|    |                                                    |                                                                                                                                                 |   |                    |                    |    |     |
|----|----------------------------------------------------|-------------------------------------------------------------------------------------------------------------------------------------------------|---|--------------------|--------------------|----|-----|
|    |                                                    | - Pathogenic<br>Variant Exon 5<br>p.H168R                                                                                                       |   |                    |                    |    |     |
| 65 | Undifferentiated<br><br>pleomorphic<br><br>sarcoma | NF1 (+);<br><br>PK3CA (+);<br><br>PTEN (+);<br><br>TP53 (+); PD-<br>L1 (+) - 30%                                                                | 6 | SD                 | SD                 | 20 | 104 |
| 66 | Synovial sarcoma                                   | none                                                                                                                                            | 6 | SD                 | SD                 | 22 | 103 |
| 67 | Leiomyosarcoma                                     | TMB -<br><br>intermediate;<br><br>ATRX (+),<br><br>RET (+)                                                                                      | 1 | PD                 | PD                 | 7  | 17  |
| 68 | Spindle cell<br><br>sarcoma                        | RB1 - loss;<br><br>TP53 - loss;<br><br>HGB, IKZF3,<br><br>MLL2, MSH3,<br><br>MYST3,<br><br>NSD1, PDG-<br>FRB, RAD50,<br><br>TET2,<br><br>TUSC3, | 8 | CR<br><br>surgical | CR<br><br>surgical | 30 | 94  |

|    |                  |                                                                                                                                      |   |    |    |    |    |
|----|------------------|--------------------------------------------------------------------------------------------------------------------------------------|---|----|----|----|----|
|    |                  | WDR90 (+);<br>MLH1:<br>Positive 2+,<br>60%; MSH2:<br>Positive 2+,<br>85%; MSH6:<br>Positive 2+,<br>85%; PMS2:<br>Positive 2+,<br>85% |   |    |    |    |    |
| 69 | Giant Cell Tumor | PD-L1 (+) -<br>5%; KRAS (+)<br>-G12F;<br>PIK3R1 (+);<br>POT1 (+)                                                                     | 1 | SD | SD | 4  | 26 |
| 70 | Leiomyosarcoma   | NTRK1 Fusion<br>Detected --<br>Exon 10<br>CIK4A2-NTR<br>K1; TP53 (+);<br>PTEN (+);<br>MTAP - loss;                                   | 2 | NE | NE | NE | 22 |

|    |                    |                                                                                                                                                                                             |    |    |    |    |    |
|----|--------------------|---------------------------------------------------------------------------------------------------------------------------------------------------------------------------------------------|----|----|----|----|----|
|    |                    | KIT -<br>amplification;<br>CDKN2A -<br>loss; CDKN2B<br>- loss; NF1 -<br>loss; EGFR<br>amplification;<br>MEN1 - loss;<br>KDR<br>amplification;<br>PDGFRA -<br>amplification;<br>TP53 - E221* |    |    |    |    |    |
| 71 | Clear cell sarcoma | none                                                                                                                                                                                        | 1  | NE | NE | NE | 6  |
| 72 | Liposarcoma        | MLH1 -<br>Positive 2+,<br>98%; MSH2 -<br>Positive 3+,<br>95%; MSH6 -<br>Positive 1+,<br>99%; PMS2 -                                                                                         | 13 | SD | SD | 48 | 84 |
|    |                    | Positive 1+,<br>99%                                                                                                                                                                         |    |    |    |    |    |



|    |                |                                                                                                                                                                                                                                                               |    |    |    |    |    |
|----|----------------|---------------------------------------------------------------------------------------------------------------------------------------------------------------------------------------------------------------------------------------------------------------|----|----|----|----|----|
| 73 | Leiomyosarcoma | CDKN2A,<br>CDKN2B deep<br>deletion; CD10<br>(+); pan-TRK<br>(+); ZC3H7B:<br>Pathogenic Fu-<br>sion Detected;<br>MLH1 Positive<br>2+, 95%;<br>MSH2 Positive<br>2+, 95%;<br>MSH6 Positive<br>1+, 20%;<br>PMS2 Positive<br>2+, 95%;<br>PTEN Positive<br>2+, 100% | 3  | SD | SD | 12 | 84 |
| 74 | Liposarcoma    | CDK4 (+);<br>MDM2 (+);                                                                                                                                                                                                                                        | <1 | NE | NE | NE | 13 |
|    |                | JUN -<br>amplification                                                                                                                                                                                                                                        |    |    |    |    |    |

|    |                     |                                                                                                                                                                                    |    |    |    |    |    |
|----|---------------------|------------------------------------------------------------------------------------------------------------------------------------------------------------------------------------|----|----|----|----|----|
| 75 | Pleomorphic sarcoma | PTEN -<br>Alteration:<br>Loss; TP53 -<br>Alteration:<br>V216L; PTEN<br>- PTEN-<br>CFL1P1<br>rearrangement;<br>KDR -<br>L462V; RAF1 -<br>N553H;<br>FGFR3 -<br>P572L; TSC1 -<br>R37H | 5  | SD | SD | 16 | 34 |
| 76 | Liposarcoma         | PTEN - loss;<br>JUN -<br>amplification;<br>ATR - splice<br>site 5739-<br>1G>A; RB1 -                                                                                               | 12 | SD | SD | 41 | 81 |

|    |                |                                                                                                                                                                                                                                                       |    |    |    |    |    |
|----|----------------|-------------------------------------------------------------------------------------------------------------------------------------------------------------------------------------------------------------------------------------------------------|----|----|----|----|----|
|    |                | <p>E466*; ATRX</p> <p>- splice site</p> <p>6849+2T&gt;C;</p> <p>Tumor Muta-<br/>tional Burden</p> <p>- 8.83 muta-<br/>tions-per-<br/>megabase</p>                                                                                                     |    |    |    |    |    |
| 77 | Leiomyosarcoma | <p>PTEN - loss;</p> <p>MED12 -</p> <p>G44D; TP53 -</p> <p>Y236C; Tumor</p> <p>Mutational</p> <p>Burden - 2.52</p> <p>mutations-per-<br/>megabase;</p> <p>MED12 -</p> <p>Pathogenic</p> <p>Variant Exon 2</p> <p>p.Y236C; TP53</p> <p>- Pathogenic</p> | 13 | SD | SD | 43 | 63 |
|    |                | <p>Variant Exon 7</p> <p>p.Y236C</p>                                                                                                                                                                                                                  |    |    |    |    |    |

|    |                                                    |                                                                                                                                                                                                                    |   |    |    |    |    |
|----|----------------------------------------------------|--------------------------------------------------------------------------------------------------------------------------------------------------------------------------------------------------------------------|---|----|----|----|----|
| 78 | Undifferentiated<br><br>pleomorphic<br><br>sarcoma | PD-L1 28-8<br><br>POSITIVE;<br><br>MSI -<br><br>indeterminate;<br><br>TMB -<br><br>indeterminate;<br><br>NTRK1/2/3 -<br><br>indeterminate                                                                          | 5 | SD | SD | 20 | 75 |
| 79 | Spindle cell<br><br>sarcoma                        | NF1 -<br><br>Pathogenic<br><br>Variant Exon 1/<br>  p.G629R;<br><br>SETD2 -<br><br>Pathogenic Var-<br>iant Exon 3<br><br>- (Histone- ly-<br>sine N- methyl-<br>transferase in-<br>hibitors) ;<br><br>MLH1 Positive | 2 | PD | PD | 6  | 27 |

|    |                 |                                                                                                                                                                                           |    |    |    |    |    |
|----|-----------------|-------------------------------------------------------------------------------------------------------------------------------------------------------------------------------------------|----|----|----|----|----|
|    |                 | 2+, 90%;<br>MSH2 Positive<br>3+, 95%;<br>MSH6 Positive<br>1+, 100%;<br>PMS2 Positive<br>1+, 100%                                                                                          |    |    |    |    |    |
| 80 | Leiomyosarcoma  | none                                                                                                                                                                                      | <1 | NE | NE | NE | 3  |
| 81 | Uterine sarcoma | CDK4:<br>amplification;<br>MDM2:<br>amplification;<br>ATM:<br>V734fs*2;<br>Tumor Muta-<br>tional Burden:<br>1.26 muta-<br>tions-per-<br>megabase;<br>MAP2K4:<br>amplification;<br>BCORL1: | 3  | SD | SD | 12 | 67 |

|    |                                                    |                                                                                                                                          |    |    |    |   |    |
|----|----------------------------------------------------|------------------------------------------------------------------------------------------------------------------------------------------|----|----|----|---|----|
|    |                                                    | P467A;<br>ERBB3:<br>G780E;<br>CARD11:<br>S694L; AXL:<br>V150A;<br>FANCG:<br>A153G;<br>HSD3B1:<br>L212R;<br>CHEK2:<br>D82_E86del          |    |    |    |   |    |
| 82 | Undifferentiated<br><br>pleomorphic<br><br>sarcoma | PD-L1<br>(SP142):<br>Positive 2+,<br>5%; MLH1:<br>Positive 2+,<br>95%; MSH2:<br>Positive 2+,<br>95%; MSH6:<br>Positive 1+,<br>95%; PMS2: | <1 | PD | PD | 6 | 66 |
|    |                                                    | Positive 3+,<br>80%                                                                                                                      | 30 |    |    |   |    |

|    |                |                                                                                                                                                                       |   |    |    |    |    |
|----|----------------|-----------------------------------------------------------------------------------------------------------------------------------------------------------------------|---|----|----|----|----|
| 83 | Leiomyosarcoma | ER positive<br>2+, 100%;<br>MSH6 Positive<br>1+, 60%;<br>ATRX<br>Pathogenic<br>Variant Exon 9<br>p.K690fs;<br>CHEK2 Likely<br>Pathogenic<br>Variant Exon 4<br>p.I157T | 2 | PD | PD | 8  | 64 |
| 84 | Leiomyosarcoma | PR - Positive<br>1+, 10%;<br>MED12 -<br>Pathogenic<br>Variant Exon 2<br>p.G44C, MSH2<br>Positive 2+,<br>80%; MSH6                                                     | 9 | SD | SD | 29 | 41 |

|    |             |                                                                                                                                                                                                         |    |    |    |   |   |
|----|-------------|---------------------------------------------------------------------------------------------------------------------------------------------------------------------------------------------------------|----|----|----|---|---|
|    |             | Positive 2+,<br>50%; PTEN<br>Positive 2+,<br>100%; MLH1<br>Positive 1+,<br>40%; PMS2<br>Positive 2+,<br>95%                                                                                             |    |    |    |   |   |
| 85 | Liposarcoma | MDM2:<br>Amplification;<br>ZNF217:<br>Amplification;<br>CDK4:<br>Amplification ;<br>PIK3C2G:<br>Amplification;<br>ATRX: Loss;<br>MUTYH -<br>R505W; WT1 -<br>A100G; TSC1 -<br>K587R; CDK4:<br>Amplified; | 1  | NE | NE | 5 | 8 |
|    |             | MDM2:<br>Amplified                                                                                                                                                                                      | 32 |    |    |   |   |



|    |                |                                                                                                                                                                                                                                                                                  |    |    |    |    |    |
|----|----------------|----------------------------------------------------------------------------------------------------------------------------------------------------------------------------------------------------------------------------------------------------------------------------------|----|----|----|----|----|
| 86 | Leiomyosarcoma | C17orf39<br>amplification,<br>ESR1<br>amplification;<br>RB1 loss;<br>PTEN loss;<br>AKT1<br>amplification;<br>ATRX<br>ATRX-BAGE4<br>;BAGE5;BAG<br>E2;BAGE3<br>truncation;<br>PIK3CA<br>E545K; TP53<br>P390fs*32;<br>TP53<br>Pathogenic<br>Variant, Exon<br>11 p.P390fs;<br>PIK3CA | 11 | CR | CR | 34 | 59 |
|----|----------------|----------------------------------------------------------------------------------------------------------------------------------------------------------------------------------------------------------------------------------------------------------------------------------|----|----|----|----|----|

|    |                |                                                                                                                                                                                                                                |    |    |    |    |    |
|----|----------------|--------------------------------------------------------------------------------------------------------------------------------------------------------------------------------------------------------------------------------|----|----|----|----|----|
|    |                | -Pathogenic<br>Variant Exon<br>10 p.E545K;<br>ER Positive 2+,<br>30%; MLH1<br>-Positive 2+,<br>30%; MSH2<br>-Positive 2+,<br>30%; MSH6<br>-Positive 2+,<br>35% ; PMS2 -<br>Positive 2+,<br>35%; PTEN -<br>Positive 2+,<br>100% |    |    |    |    |    |
| 87 | Leiomyosarcoma | MAP3K6<br>splice site<br>1256-2A>G;<br>RB1 R445*;<br>TP53 loss<br>exons 2-4                                                                                                                                                    | 17 | PR | PR | 55 | 59 |

|    |                |                                                                                                                                                                                                                                                                                                                                                |   |    |    |    |    |
|----|----------------|------------------------------------------------------------------------------------------------------------------------------------------------------------------------------------------------------------------------------------------------------------------------------------------------------------------------------------------------|---|----|----|----|----|
| 88 | Leiomyosarcoma | RB1 - loss;<br>PTCH1 - splice<br>site 2561-<br>2A>G; ATRX -<br>E723fs*9;<br>TP53-<br>R209fs*6;<br>TMB - 1.26<br>mutations-per-<br>megabase;<br>ATRX -<br>Pathogenic;<br>Variant, Exon 9<br>p.E723fs;<br>PTCH1 -<br>Pathogenic<br>Variant, Exon<br>16 c.2561-<br>2A>G; TP53 -<br>Pathogenic<br>Variant, Exon 6<br>p.R209fs; PD-<br>L1 (SP142) - | 6 | PR | PR | 29 | 54 |
|----|----------------|------------------------------------------------------------------------------------------------------------------------------------------------------------------------------------------------------------------------------------------------------------------------------------------------------------------------------------------------|---|----|----|----|----|

|    |                |                                                                                                                                                                                                             |    |    |    |    |    |
|----|----------------|-------------------------------------------------------------------------------------------------------------------------------------------------------------------------------------------------------------|----|----|----|----|----|
|    |                | Positive 2+,<br>5%; ER -<br>Positive 2+,<br>45%; MLH1 -<br>Positive 1+,<br>45%; MSH2 -<br>Positive 2+,<br>90%; MSH6 -<br>Positive 2+,<br>90%; PMS2 -<br>Positive 2+,<br>50%; PTEN -<br>Positive 2+,<br>100% |    |    |    |    |    |
| 89 | Leiomyosarcoma | ER Positive;<br>MLH1 Positive<br>1+, 90%;<br>MSH2 Positive<br>2+, 95%;<br>MSH6 Positive<br>2+, 95%;<br>PTEN Positive<br>1+, 100%;                                                                           | 8  | SD | SD | 27 | 56 |
|    |                | PMS2 Positive<br>2+, 90%                                                                                                                                                                                    | 36 |    |    |    |    |

|    |                               |                                                                                                                                                                            |    |    |    |    |    |
|----|-------------------------------|----------------------------------------------------------------------------------------------------------------------------------------------------------------------------|----|----|----|----|----|
| 90 | Rhabdomyosarcoma              | PIK3CA<br>p.H1047L;<br>NM_006218.2:<br>c.3140A>T;<br>Estimated variant allele frequency: 31%                                                                               | 5  | SD | SD | 18 | 54 |
| 91 | Liposarcoma, dedifferentiated | MTAP loss;<br>ATRX loss;<br>FGFR1<br>amplification;<br>CDKN2B loss;<br>CDKN2A loss;<br>BCL2<br>amplification;<br>EPHB1<br>amplification;<br>MDM2<br>amplification;<br>CDK4 | <1 | SD | SD | 10 | 10 |
|    |                               | amplification;<br>CHEK2<br>T367fs*15                                                                                                                                       |    |    |    |    |    |

|    |             |                                                                                                                                 |   |    |    |    |    |
|----|-------------|---------------------------------------------------------------------------------------------------------------------------------|---|----|----|----|----|
| 92 | Liposarcoma | CDK4<br>amplification;<br>MDM2<br>amplification;<br>MTAP<br>amplification;<br>CDK4<br>CDK4-OS9<br>rearrangement;<br>FGFR3 P129L | 7 | SD | SD | 24 | 49 |
|----|-------------|---------------------------------------------------------------------------------------------------------------------------------|---|----|----|----|----|
